# Supplementary material for: Effects of short-term exposure to air pollution on hospital admissions for autism spectrum disorder in Korean school-aged children: a nationwide time-series study
Source: HighWire-hosted journal article supplement (doi:10.1136/bmjopen-2021-058286), 2022-09-01
Supplement: bmjopen-2021-058286supp001_data_supplement.pdf [file bmjopen-2021-058286supp001_data_supplement.pdf]

## Online Supplement

### **Effects of short-term exposure to air pollution on hospital admissions for autism spectrum disorder in Korean school-aged children: A nationwide time-series study**

Kyoung-Nam Kim, Ji Hoon Sohn, Sung Joon Cho, Hwo Yeon Seo, Soontae Kim, Yun-Chul Hong

#### **Table of Contents**

**Online Supplementary Table 1.** Demographic and meteorological features of the regions in the Republic of Korea

**Online Supplementary Table 2.** Associations between PM<sub>2.5</sub>, NO<sub>2</sub>, and O<sub>3</sub> levels and hospital admissions for autism spectrum disorder in seven metropolitan cities and nine non-metropolitan regions

**Online Supplementary Table 3.** Associations of PM<sub>2.5</sub>, NO<sub>2</sub>, and O<sub>3</sub> levels with hospital admissions for autism spectrum disorder in a multiple-pollutant model

**Online Supplementary Figure 1.** Correlations among air pollutant levels (PM<sub>2.5</sub>, NO<sub>2</sub>, and O<sub>3</sub>).

**Online Supplementary Figure 2.** Estimated weights of air pollution exposures in the weighted quantile sum regression analysis. PM<sub>2.5</sub>, NO<sub>2</sub>, and O<sub>3</sub> represent PM<sub>2.5</sub> levels at lag day 1, NO<sub>2</sub>

levels at lag day 5, and O<sub>3</sub> levels at lag day 4, respectively.

**Online Supplementary Figure 3.** Daily concentrations of PM<sub>2.5</sub> and counts of hospital admissions for autism spectrum disorder in Seoul, in January 2015.

**Online Supplementary Table 1.** Demographic and meteorological features of the regions in the Republic of Korea

| Region            | Area (km <sup>2</sup> ) | Population <sup>a</sup> | Temperature (°C) <sup>b</sup> | Relative humidity (%) <sup>b</sup> |
|-------------------|-------------------------|-------------------------|-------------------------------|------------------------------------|
| Seoul             | 605                     | 9,794,304               | 12.8                          | 59.8                               |
| Busan             | 770                     | 3,414,950               | 15.0                          | 61.8                               |
| Daegu             | 884                     | 2,446,418               | 14.5                          | 59.0                               |
| Incheon           | 1,063                   | 2,662,509               | 11.6                          | 71.5                               |
| Gwangju           | 501                     | 1,475,745               | 14.2                          | 67.1                               |
| Daejeon           | 539                     | 1,501,859               | 13.2                          | 69.5                               |
| Ulsan             | 1,061                   | 1,082,567               | 14.4                          | 63.6                               |
| Gyeonggi-do       | 10,187                  | 11,379,459              | 11.8                          | 67.3                               |
| Gangwon-do        | 16,828                  | 1,471,513               | 11.2                          | 66.1                               |
| Chungcheongbuk-do | 7,408                   | 1,512,157               | 11.7                          | 66.7                               |
| Chungcheongnam-do | 8,691                   | 2,028,002               | 12.3                          | 72.2                               |
| Jeollabuk-do      | 8,069                   | 1,777,220               | 12.7                          | 71.8                               |
| Jeollanam-do      | 12,335                  | 1,741,499               | 13.6                          | 72.5                               |
| Gyeongsangbuk-do  | 19,033                  | 2,600,032               | 12.4                          | 65.5                               |
| Gyeongsangnam-do  | 10,540                  | 3,160,154               | 13.8                          | 65.5                               |
| Jeju-do           | 1,850                   | 531,905                 | 16.1                          | 72.7                               |

<sup>a</sup> 2010 census

<sup>b</sup> Means during the study period (2011–2015)

**Online Supplementary Table 2.** Associations between PM<sub>2.5</sub>, NO<sub>2</sub>, and O<sub>3</sub> levels and hospital admissions for autism spectrum disorder in seven metropolitan cities and nine non-metropolitan regions<sup>a</sup>

|       | Seven metropolitan cities |                 |                | Nine non-metropolitan regions |                 |                |
|-------|---------------------------|-----------------|----------------|-------------------------------|-----------------|----------------|
|       | PM <sub>2.5</sub>         | NO <sub>2</sub> | O <sub>3</sub> | PM <sub>2.5</sub>             | NO <sub>2</sub> | O <sub>3</sub> |
|       | RR (95% CI)               | RR (95% CI)     | RR (95% CI)    | RR (95% CI)                   | RR (95% CI)     | RR (95% CI)    |
| Lag   | 0.91                      | 0.75            | 1.00           | 0.79                          | 0.88            | 0.98           |
| day 0 | (0.78, 1.05)              | (0.55, 1.01)    | (0.87, 1.14)   | (0.71, 0.87)*                 | (0.69, 1.13)    | (0.89, 1.07)   |
| Lag   | 1.16                      | 1.07            | 1.11           | 1.19                          | 1.13            | 1.01           |
| day 1 | (1.01, 1.34)*             | (0.80, 1.43)    | (0.97, 1.26)   | (1.08, 1.31)*                 | (0.89, 1.43)    | (0.92, 1.10)   |
| Lag   | 0.98                      | 0.81            | 0.97           | 1.03                          | 1.23            | 0.92           |
| day 2 | (0.89, 1.07)              | (0.68, 0.97)*   | (0.89, 1.06)   | (0.96, 1.09)                  | (1.06, 1.42)*   | (0.87, 0.98)*  |
| Lag   | 0.91                      | 0.83            | 0.92           | 0.95                          | 1.22            | 0.97           |
| day 3 | (0.83, 1.003)             | (0.69, 0.99)*   | (0.84, 1.00)*  | (0.89, 1.02)                  | (1.05, 1.41)*   | (0.91, 1.03)   |
| Lag   | 0.96                      | 1.03            | 0.94           | 1.00                          | 1.16            | 1.08           |
| day 4 | (0.89, 1.04)              | (0.90, 1.19)    | (0.87, 1.01)   | (0.94, 1.05)                  | (1.03, 1.31)*   | (1.03, 1.14)*  |
| Lag   | 0.99                      | 1.16            | 0.97           | 1.03                          | 1.09            | 1.11           |
| day 5 | (0.90, 1.08)              | (0.98, 1.37)    | (0.89, 1.05)   | (0.96, 1.09)                  | (0.95, 1.25)    | (1.05, 1.17)*  |
| Lag   | 0.96                      | 1.08            | 0.98           | 1.01                          | 1.03            | 1.01           |
| day 6 | (0.89, 1.03)              | (0.96, 1.22)    | (0.92, 1.05)   | (0.96, 1.06)                  | (0.93, 1.14)    | (0.97, 1.05)   |

<sup>a</sup>The results are presented for a 10.0 µg/m<sup>3</sup> increase for PM<sub>2.5</sub> and 10.0 ppb for NO<sub>2</sub> and O<sub>3</sub>, respectively, in models adjusted for region, day, temperature, relative humidity, and population.

RR = relative risk; CI = confidence interval.

\*p <0.05.

**Online Supplementary Table 3.** Associations of PM<sub>2.5</sub>, NO<sub>2</sub>, and O<sub>3</sub> levels with hospital admissions for autism spectrum disorder in a multiple-pollutant model<sup>a</sup>

|           | PM <sub>2.5</sub> | NO <sub>2</sub>   | O <sub>3</sub>    |
|-----------|-------------------|-------------------|-------------------|
|           | RR (95% CI)       | RR (95% CI)       | RR (95% CI)       |
| Lag day 0 | 0.84 (0.78, 0.90) | 0.93 (0.81, 1.08) | 1.00 (0.95, 1.06) |
| Lag day 1 | 1.13 (1.06, 1.21) | 1.00 (0.87, 1.15) | 1.07 (1.01, 1.13) |
| Lag day 2 | 1.05 (1.01, 1.10) | 0.93 (0.85, 1.01) | 1.01 (0.97, 1.05) |
| Lag day 3 | 1.00 (0.95, 1.04) | 0.96 (0.88, 1.05) | 0.99 (0.96, 1.03) |
| Lag day 4 | 0.99 (0.96, 1.03) | 1.05 (0.98, 1.13) | 1.01 (0.98, 1.04) |
| Lag day 5 | 0.99 (0.94, 1.03) | 1.09 (1.00, 1.18) | 1.01 (0.97, 1.05) |
| Lag day 6 | 0.95 (0.92, 0.99) | 1.03 (0.97, 1.09) | 0.99 (0.97, 1.02) |

<sup>a</sup> The results are presented for a 10.0 µg/m<sup>3</sup> increase for PM<sub>2.5</sub> and 10.0 ppb for NO<sub>2</sub> and O<sub>3</sub> from the model incorporating all three air pollution exposures (PM<sub>2.5</sub>, NO<sub>2</sub>, and O<sub>3</sub>) and adjusted for region, day, temperature, relative humidity, and population. RR = relative risk; CI = confidence interval.

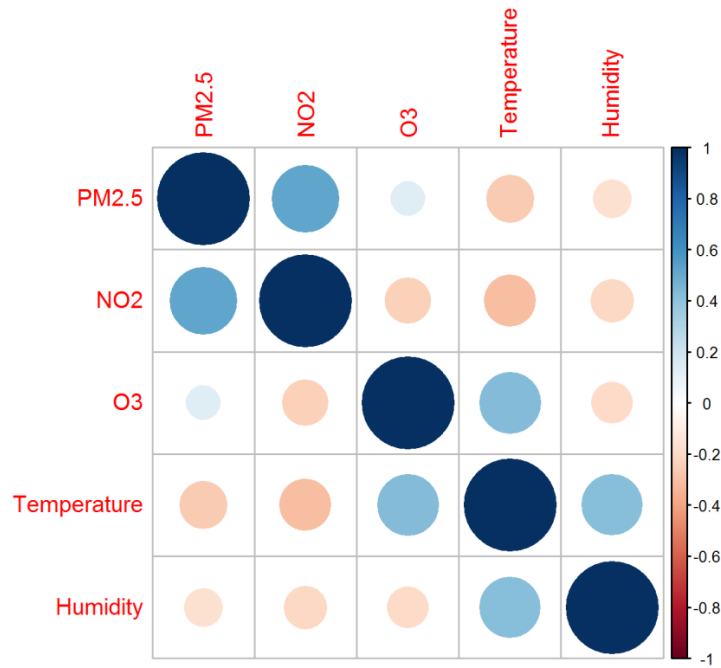

**Online Supplementary Figure 1.** Correlations among air pollutant levels (PM<sub>2.5</sub>, NO<sub>2</sub>, and O<sub>3</sub>).

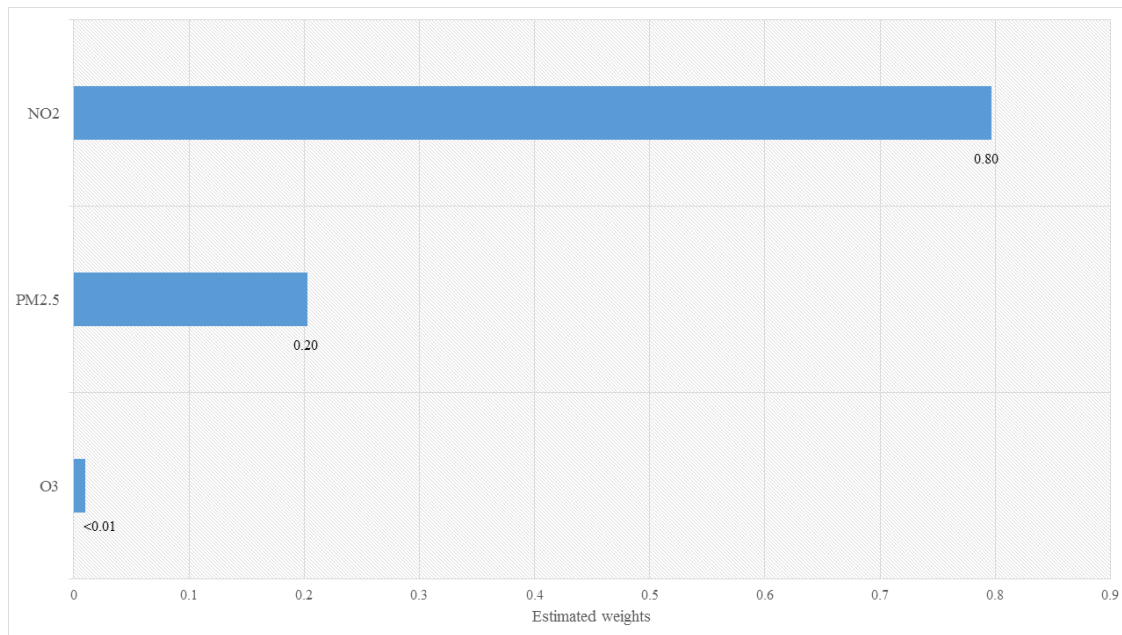

**Online Supplementary Figure 2.** Estimated weights of air pollution exposures in the weighted quantile sum regression analysis. PM<sub>2.5</sub>, NO<sub>2</sub>, and O<sub>3</sub> represent PM<sub>2.5</sub> levels at lag day 1, NO<sub>2</sub> levels at lag day 5, and O<sub>3</sub> levels at lag day 4, respectively.



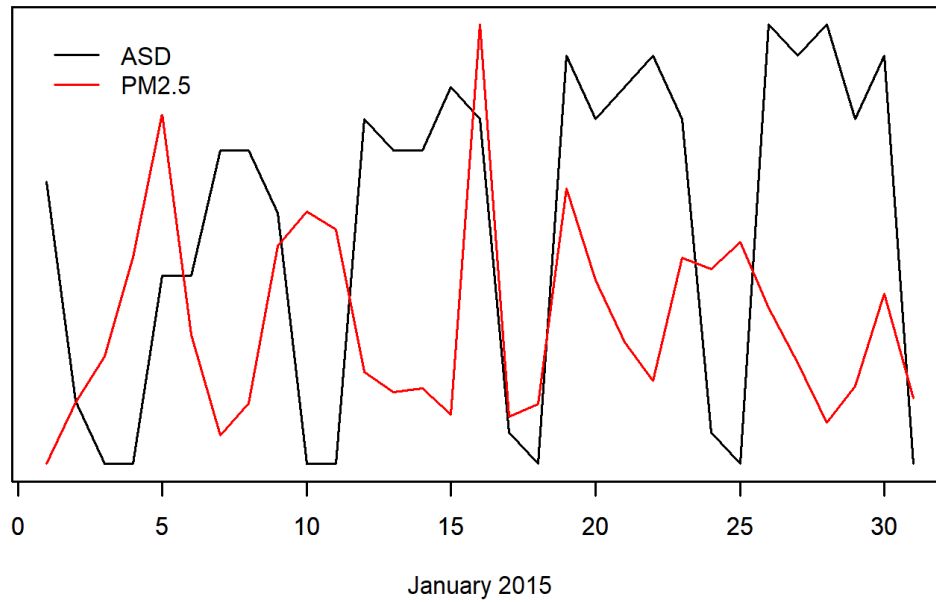

**Online Supplementary Figure 3.** Daily concentrations of PM<sub>2.5</sub> and counts of hospital admissions for autism spectrum disorder in Seoul, in January 2015. ASD, autism spectrum disorder.
